# Supplementary material for: Synergistic effects of floral phytochemicals against a bumble bee parasite
Source: PubMed Central journal article supplement (PMC5355193; doi:10.1002/ece3.2794), 2017-02-15
Supplement: ECE3-7-1836-s001.pdf [file ECE3-7-1836-s001.pdf]

## 1 Supplementary Tables

2 Table S1. Full model parameters for the interactive effects of eugenol and thymol on four strains  
 3 of *C. bombi*. Model parameters were estimated using a Universal Response Surface Analysis as  
 4 described by Greco *et al.* (Greco *et al.* 1990, 1995). The parameter “m” describes how rapidly  
 5 growth decreased at the EC50 phytochemical concentration. Parameter “gmin” represents the  
 6 lower limit of growth at very high phytochemical concentrations; “gmax” represents the  
 7 maximum growth in the absence of phytochemicals. The EC50 is the concentration (in ppm  
 8 phytochemical) that inhibited growth by 50%. The interaction parameter “f” indicates synergy ( $f >$   
 9 0), additivity ( $f = 0$ ), or antagonism ( $f < 0$ ) between the two compounds. SE: standard error. The  
 10 parameter “s” is related to “f” by the equation

$$11 \quad s = 4(s^2 - s)$$

12 where  $s > 1$  indicates synergy,  $s = 1$  indicates additivity, and  $s < 1$  indicates antagonism. Values of  
 13 “NA” in the confidence interval indicate that the parameter was fixed to assist model  
 14 convergence.

| Strains tested in series |        |               |          |        |        |
|--------------------------|--------|---------------|----------|--------|--------|
|                          |        |               |          | 95% CI |        |
| Round                    | Strain | Parameter     | estimate | lower  | upper  |
| 1                        | IL13.2 | m(eugenol)    | -2.10    | -2.37  | -1.84  |
| 1                        | IL13.2 | m(thymol)     | -1.13    | -1.19  | -1.07  |
| 1                        | IL13.2 | gmin          | 0.50     | NA     | NA     |
| 1                        | IL13.2 | gmax          | 19.24    | NA     | NA     |
| 1                        | IL13.2 | EC50(eugenol) | 171.60   | 158.98 | 184.22 |
| 1                        | IL13.2 | EC50(thymol)  | 30.98    | 29.18  | 32.78  |
| 1                        | IL13.2 | f             | 5.07     | 4.22   | 5.93   |
| 1                        | IL13.2 | s             | 1.73     | 1.64   | 1.82   |

|   |        |               |        |        |        |
|---|--------|---------------|--------|--------|--------|
| 2 | IL13.2 | m(eugenol)    | -1.73  | -2.26  | -1.21  |
| 2 | IL13.2 | m(thymol)     | -0.69  | -0.76  | -0.61  |
| 2 | IL13.2 | gmin          | 0.53   | -0.28  | 1.35   |
| 2 | IL13.2 | gmax          | 18.53  | 17.94  | 19.13  |
| 2 | IL13.2 | EC50(eugenol) | 154.03 | 139.01 | 169.05 |
| 2 | IL13.2 | EC50(thymol)  | 28.81  | 25.11  | 32.51  |
| 2 | IL13.2 | f             | 6.14   | 3.78   | 8.50   |
| 2 | IL13.2 | s             | 1.84   | 1.59   | 2.04   |
| 3 | IL13.2 | m(eugenol)    | -2.84  | -3.05  | -2.62  |
| 3 | IL13.2 | m(thymol)     | -1.83  | -1.93  | -1.74  |
| 3 | IL13.2 | gmin          | 0.35   | 0.22   | 0.48   |
| 3 | IL13.2 | gmax          | 18.31  | 18.01  | 18.61  |
| 3 | IL13.2 | EC50(eugenol) | 123.44 | 119.09 | 127.78 |
| 3 | IL13.2 | EC50(thymol)  | 22.24  | 21.34  | 23.14  |
| 3 | IL13.2 | f             | 1.12   | 0.94   | 1.31   |
| 3 | IL13.2 | s             | 1.23   | 1.20   | 1.26   |
| 4 | VT1    | m(eugenol)    | -1.63  | -1.71  | -1.55  |
| 4 | VT1    | m(thymol)     | -1.54  | -1.62  | -1.47  |
| 4 | VT1    | gmin          | 0.55   | 0.52   | 0.59   |
| 4 | VT1    | gmax          | 7.00   | 6.90   | 7.10   |
| 4 | VT1    | EC50(eugenol) | 58.77  | 56.88  | 60.65  |
| 4 | VT1    | EC50(thymol)  | 14.88  | 14.34  | 15.43  |
| 4 | VT1    | f             | 0.69   | 0.57   | 0.81   |
| 4 | VT1    | s             | 1.15   | 1.13   | 1.17   |
| 5 | C1.1   | m(eugenol)    | -1.93  | -2.06  | -1.79  |
| 5 | C1.1   | m(thymol)     | -1.91  | -2.04  | -1.77  |
| 5 | C1.1   | gmin          | 0.49   | 0.43   | 0.54   |
| 5 | C1.1   | gmax          | 7.44   | 7.28   | 7.61   |
| 5 | C1.1   | EC50(eugenol) | 56.53  | 53.85  | 59.20  |
| 5 | C1.1   | EC50(thymol)  | 13.46  | 12.83  | 14.09  |
| 5 | C1.1   | f             | 0.33   | 0.18   | 0.48   |
| 5 | C1.1   | s             | 1.08   | 1.04   | 1.11   |
| 6 | S08    | m(eugenol)    | -1.59  | -1.64  | -1.54  |
| 6 | S08    | m(thymol)     | -1.37  | -1.43  | -1.32  |
| 6 | S08    | gmin          | 0.46   | 0.44   | 0.49   |
| 6 | S08    | gmax          | 8.25   | 8.16   | 8.33   |
| 6 | S08    | EC50(eugenol) | 43.99  | 42.87  | 45.11  |
| 6 | S08    | EC50(thymol)  | 8.47   | 8.23   | 8.71   |
| 6 | S08    | f             | 0.50   | 0.42   | 0.58   |
| 6 | S08    | s             | 1.11   | 1.10   | 1.13   |

| Strains tested in parallel |        |               |          |        |        |
|----------------------------|--------|---------------|----------|--------|--------|
|                            |        |               |          | 95% CI |        |
| Round                      | Strain | Parameter     | estimate | lower  | upper  |
| Together                   | IL13.2 | m(eugenol)    | -1.61    | -1.82  | -1.39  |
| Together                   | IL13.2 | m(thymol)     | -0.70    | -0.80  | -0.60  |
| Together                   | IL13.2 | gmin          | 0.50     | NA     | NA     |
| Together                   | IL13.2 | gmax          | 23.41    | NA     | NA     |
| Together                   | IL13.2 | EC50(eugenol) | 184.99   | 176.48 | 193.51 |
| Together                   | IL13.2 | EC50(thymol)  | 49.81    | 49.49  | 50.12  |
| Together                   | IL13.2 | f             | 6.00     | 5.76   | 6.25   |
| Together                   | IL13.2 | s             | 1.82     | 1.80   | 1.85   |
| Together                   | C1.1   | m(eugenol)    | -2.20    | -2.41  | -1.99  |
| Together                   | C1.1   | m(thymol)     | -1.61    | -1.74  | -1.47  |
| Together                   | C1.1   | gmin          | 0.50     | NA     | NA     |
| Together                   | C1.1   | gmax          | 11.37    | NA     | NA     |
| Together                   | C1.1   | EC50(eugenol) | 87.17    | 81.63  | 92.72  |
| Together                   | C1.1   | EC50(thymol)  | 22.82    | 21.39  | 24.25  |
| Together                   | C1.1   | f             | 1.34     | 0.86   | 1.82   |
| Together                   | C1.1   | s             | 1.27     | 1.18   | 1.34   |
| Together                   | VT1    | m(eugenol)    | -2.46    | -2.88  | -2.03  |
| Together                   | VT1    | m(thymol)     | -1.33    | -1.49  | -1.17  |
| Together                   | VT1    | gmin          | 0.50     | NA     | NA     |
| Together                   | VT1    | gmax          | 10.66    | 10.13  | 11.18  |
| Together                   | VT1    | EC50(eugenol) | 100.60   | 92.43  | 108.76 |
| Together                   | VT1    | EC50(thymol)  | 26.60    | 23.25  | 29.95  |
| Together                   | VT1    | f             | 2.12     | 1.68   | 2.57   |
| Together                   | VT1    | s             | 1.38     | 1.32   | 1.44   |
| Together                   | S08    | m(eugenol)    | -2.26    | -2.54  | -1.98  |
| Together                   | S08    | m(thymol)     | -1.17    | -1.29  | -1.05  |
| Together                   | S08    | gmin          | 0.50     | NA     | NA     |
| Together                   | S08    | gmax          | 13.61    | 13.07  | 14.15  |
| Together                   | S08    | EC50(eugenol) | 102.07   | 90.86  | 113.27 |
| Together                   | S08    | EC50(thymol)  | 21.29    | 18.30  | 24.28  |
| Together                   | S08    | f             | 2.96     | 1.95   | 3.98   |
| Together                   | S08    | s             | 1.50     | 1.36   | 1.62   |

15

16

## 17 **Supplementary Figures**

18 **Supplementary Figures S1-S6: Response surface plots showing combinatorial effects of**  
19 **eugenol and thymol against *C. bombi* for a series of 6 experiments on 4 strains.** Each graph  
20 shows the effects of the two compounds for a given strain and week. Contour lines on the basal  
21 x-y plane show isoclines of equal growth. The concave isoclines in panels indicate synergistic  
22 effects. The response surface shows model-predicted growth, points show observed growth, and  
23 drop-lines indicate the deviation between observed and predicted growth; drop-lines are not  
24 visible in some cases due to the orientation of the graph and the good fit of the model. Surfaces  
25 and points are color-coded according the z-axis, which shows the integral of growth over five  
26 days; z-axes are scaled according to each strain's maximum growth. Each experiment included n  
27 = 216 replicates (6 replicate wells at each of 36 combinations of eugenol and thymol). ppm: parts  
28 per million.

29

30 Figure S1. Strain IL13.2, Round 1

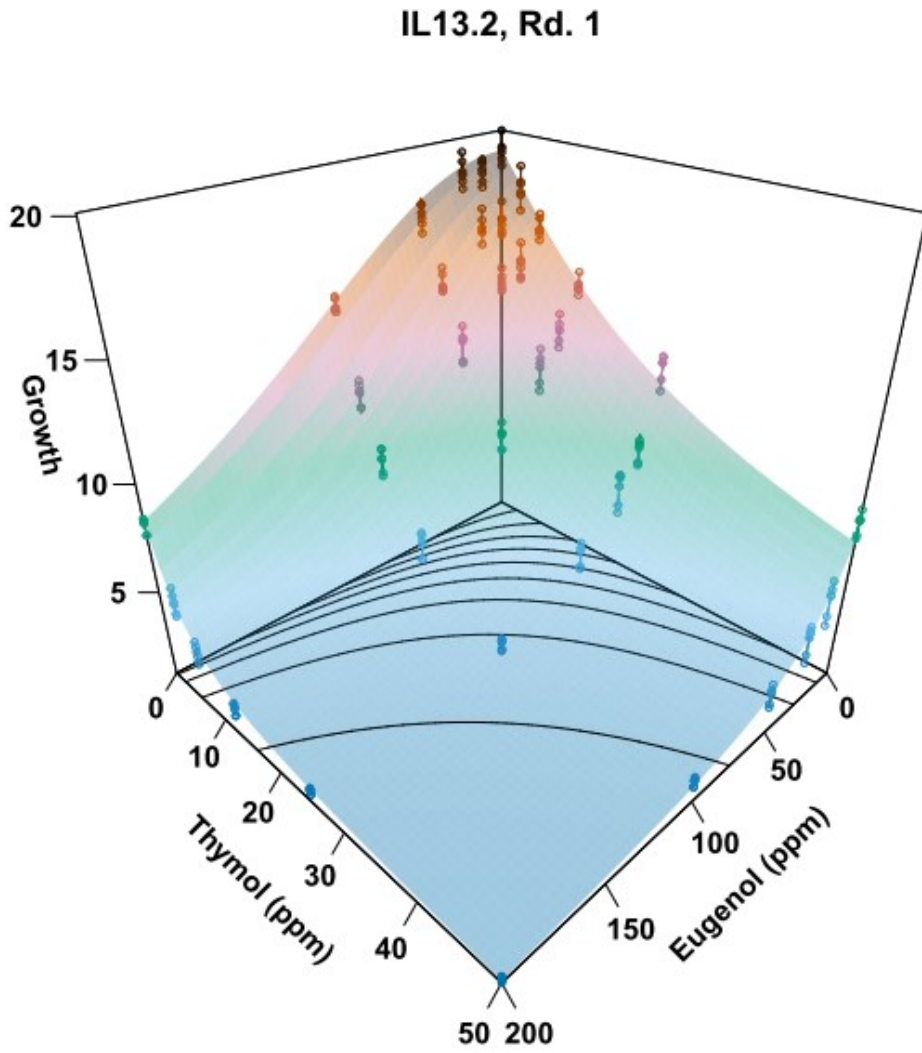

32 **Figure S2. Strain IL13.2, Round 2**

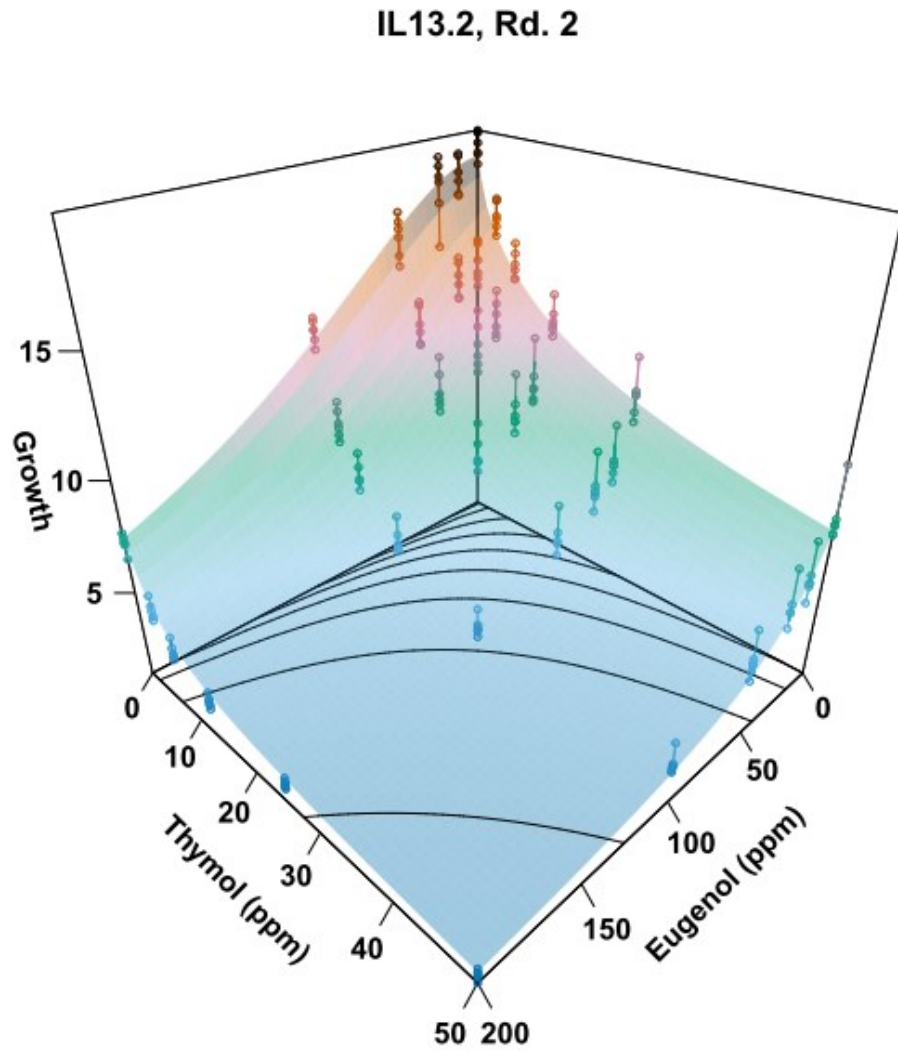

34 **Figure S3. Strain IL13.2, Round 3**

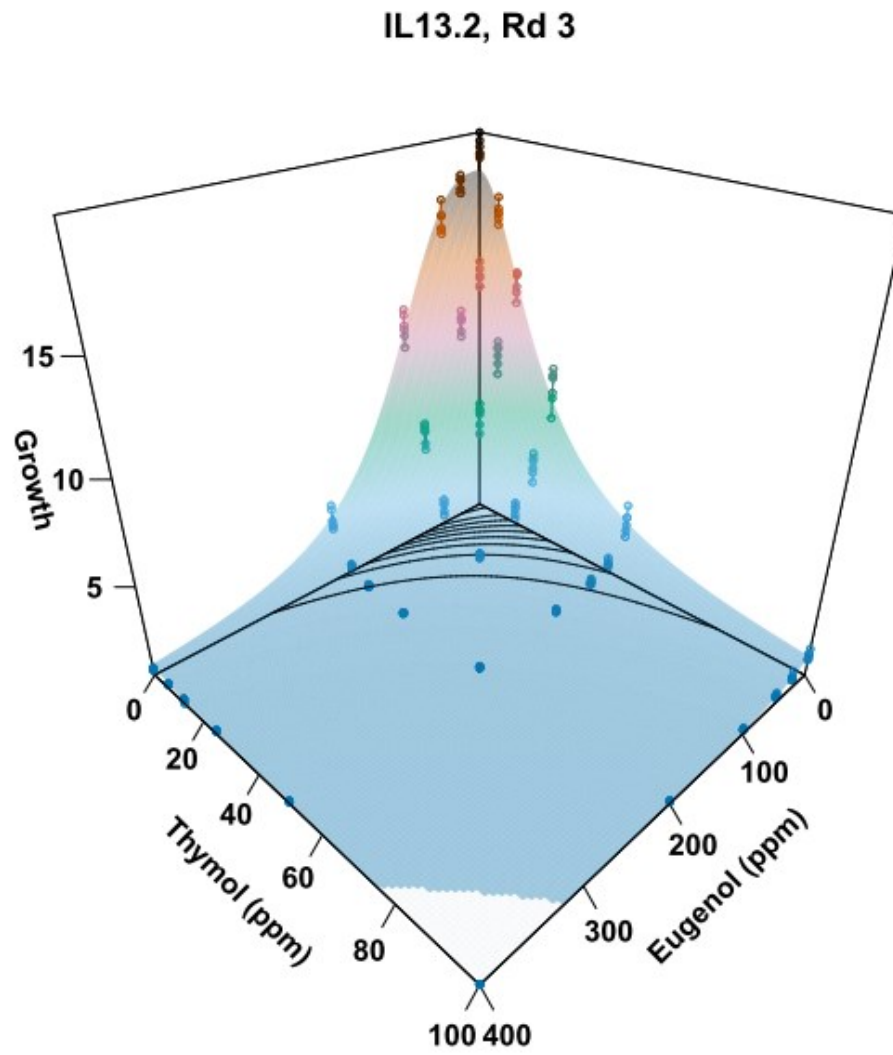

36 **Figure S4. Strain VT1**

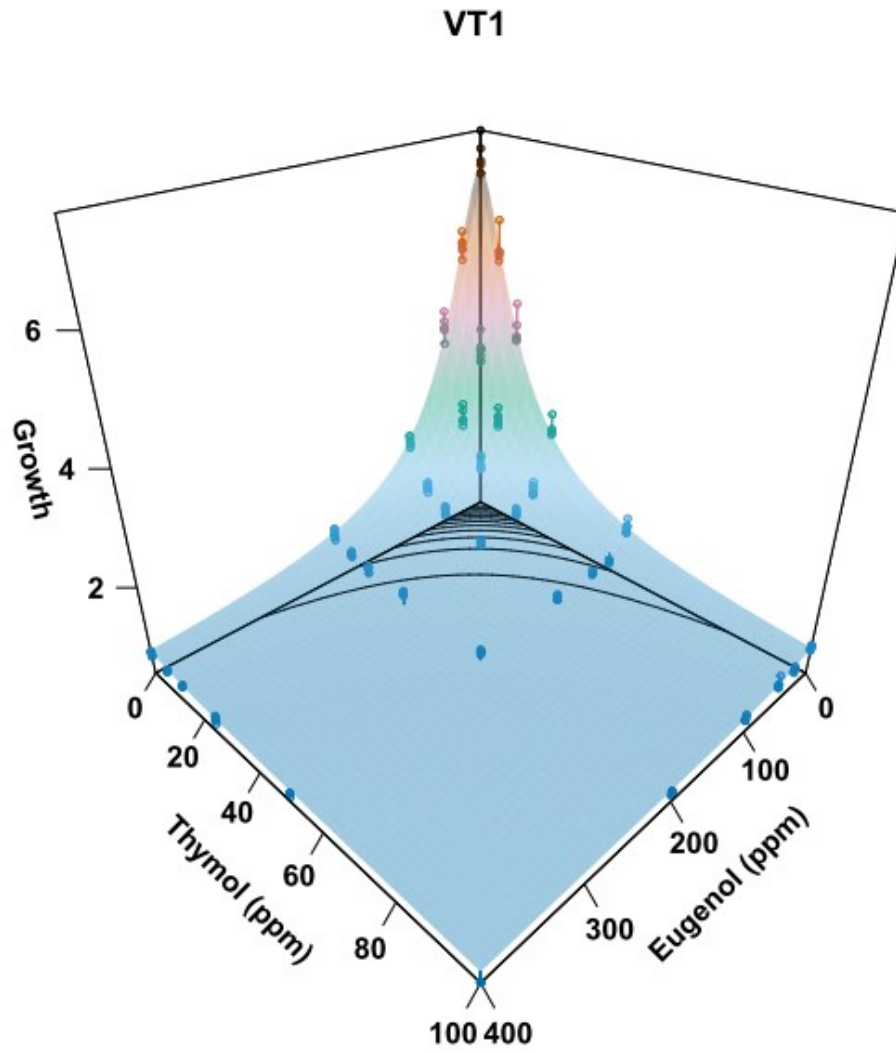



38 **Figure S5. Strain C1.1**

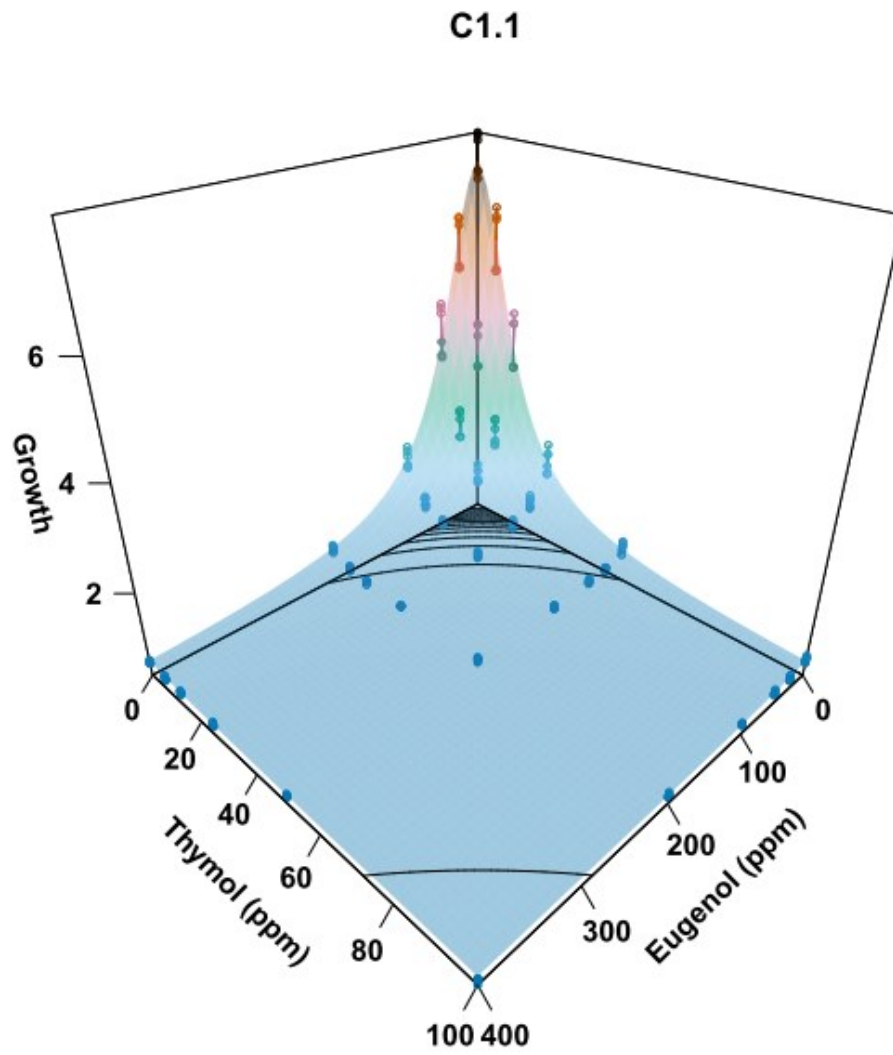

40 **Figure S6, Strain S08**

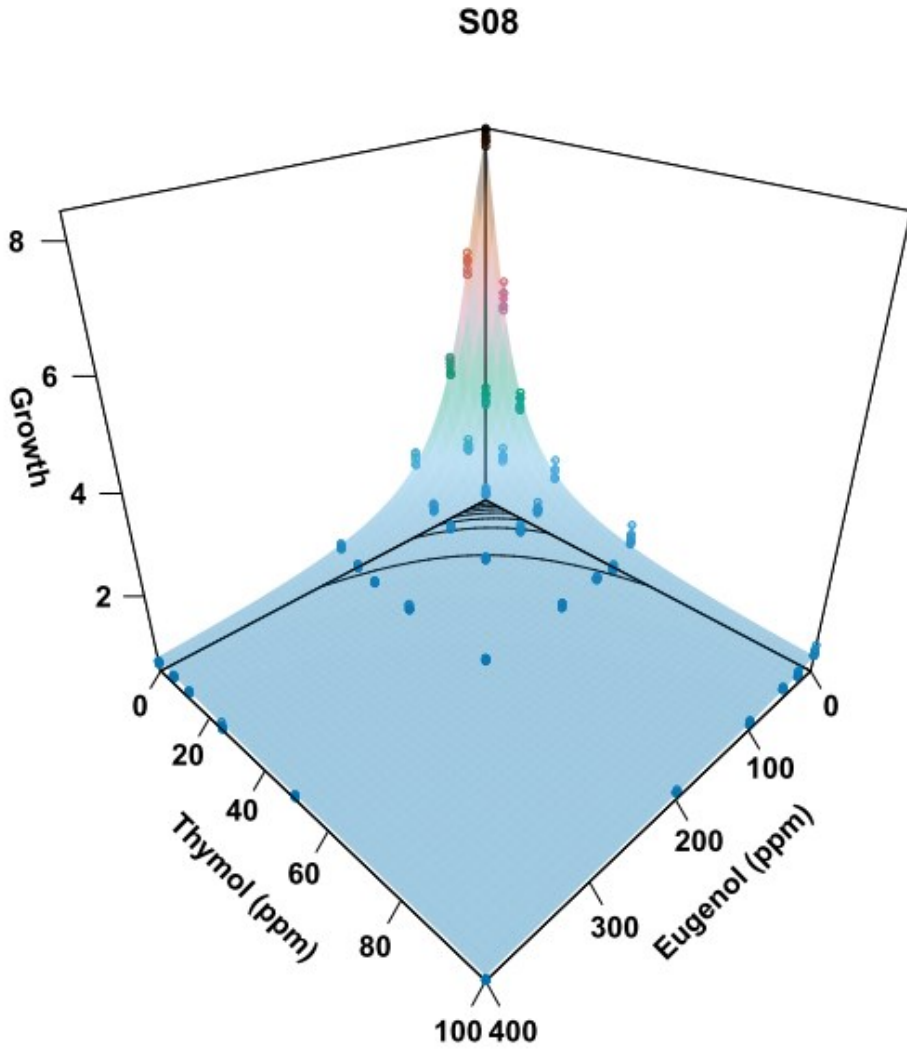

42 **Supplementary Figures S7-S10: Response surface plots for experiments with strains tested**  
43 **in parallel (i.e., concurrently).** Each graph shows the effects of the two compounds for a given  
44 strain and week. Contour lines on the basal x-y plane show isoclines of equal growth. The  
45 concave isoclines in panels indicate synergistic effects. The response surface shows model-  
46 predicted growth, points show observed growth, and drop-lines indicate the deviation between  
47 observed and predicted growth; drop-lines are not visible in some cases due to the orientation of  
48 the graph and the good fit of the model. Surfaces and points are color-coded according the z-axis,  
49 which shows the integral of growth over five days; z-axes are scaled according to each strain's  
50 maximum growth. Tests of each strain included  $n = 72$  samples (2 replicate wells at each of 36  
51 combinations of eugenol and thymol). ppm: parts per million.

52

53 **Figure S7. Strain IL13.2**

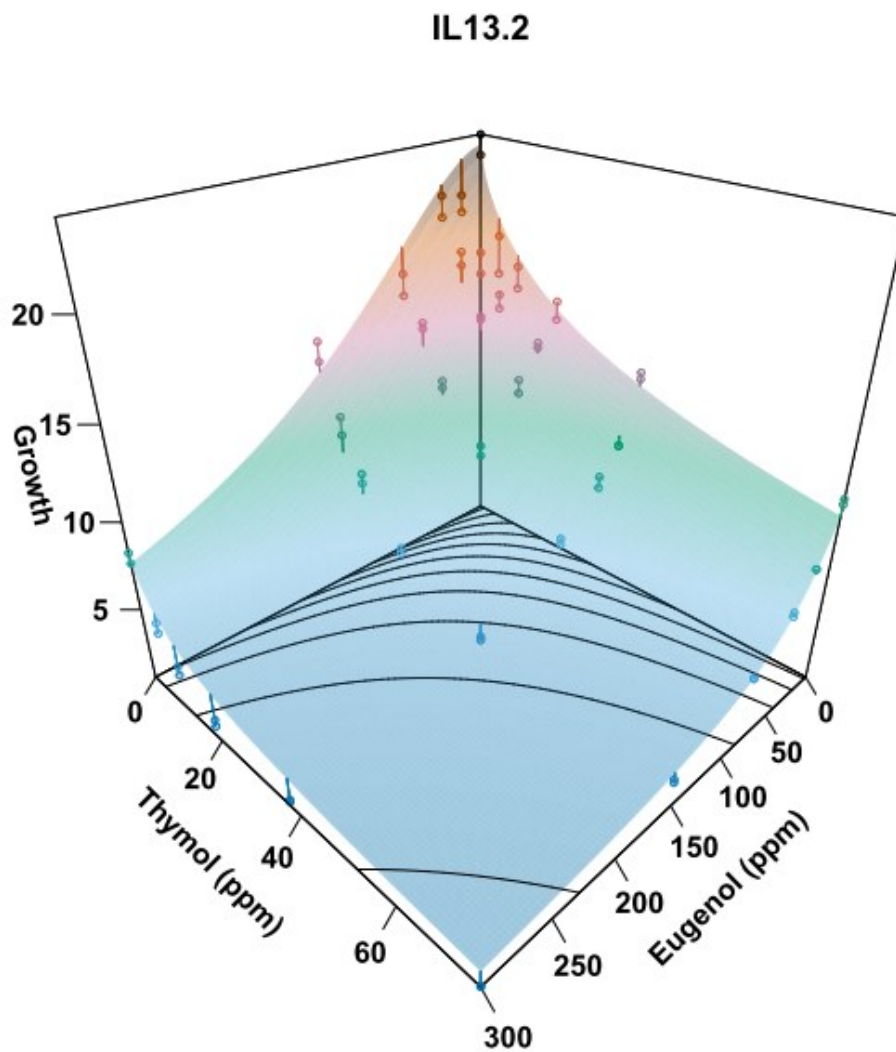

55 **Figure S8. Strain VT1**

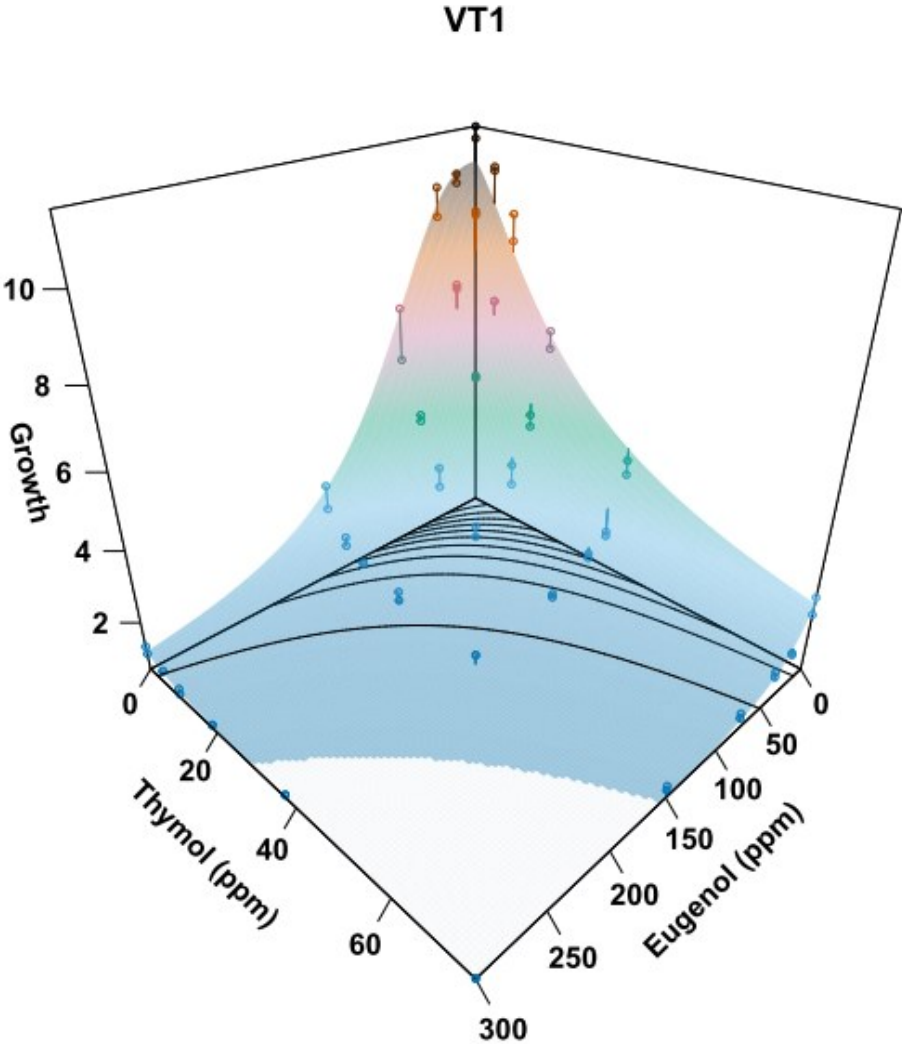

57 **Figure S9. Strain C1.1**

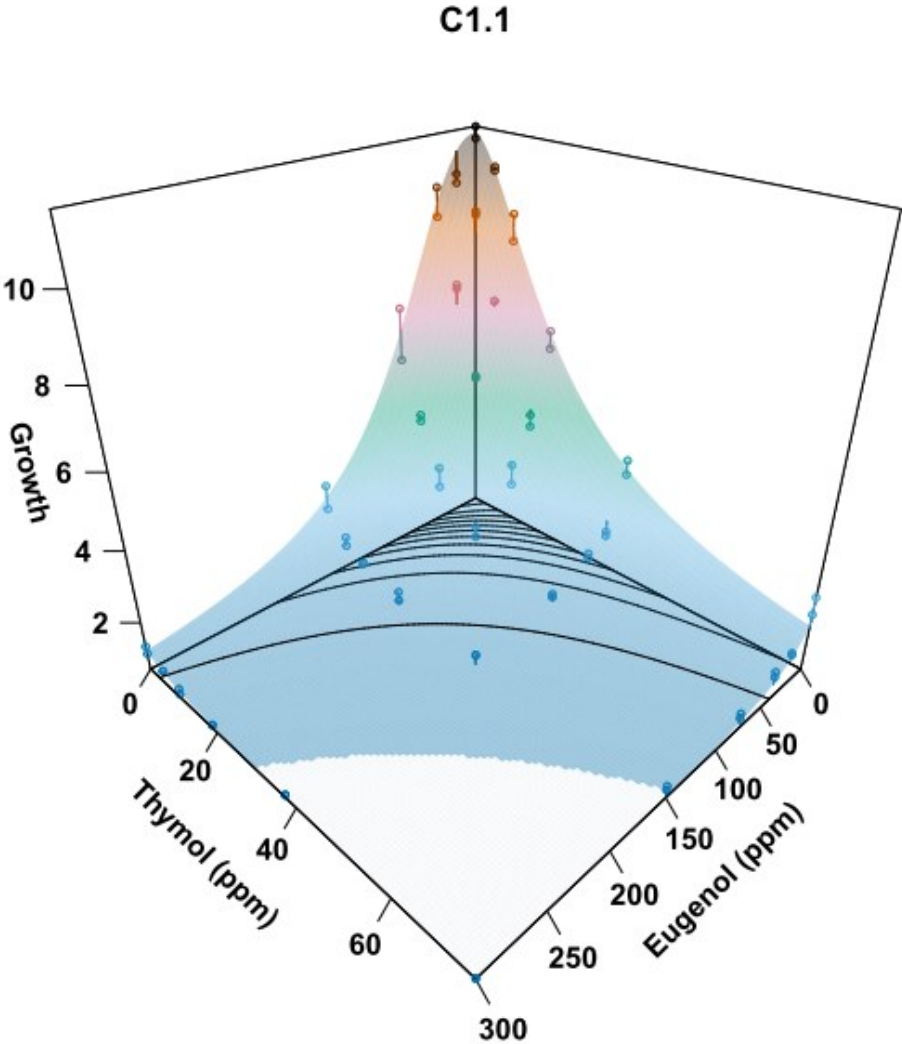

59 **Figure S10. Strain S08**

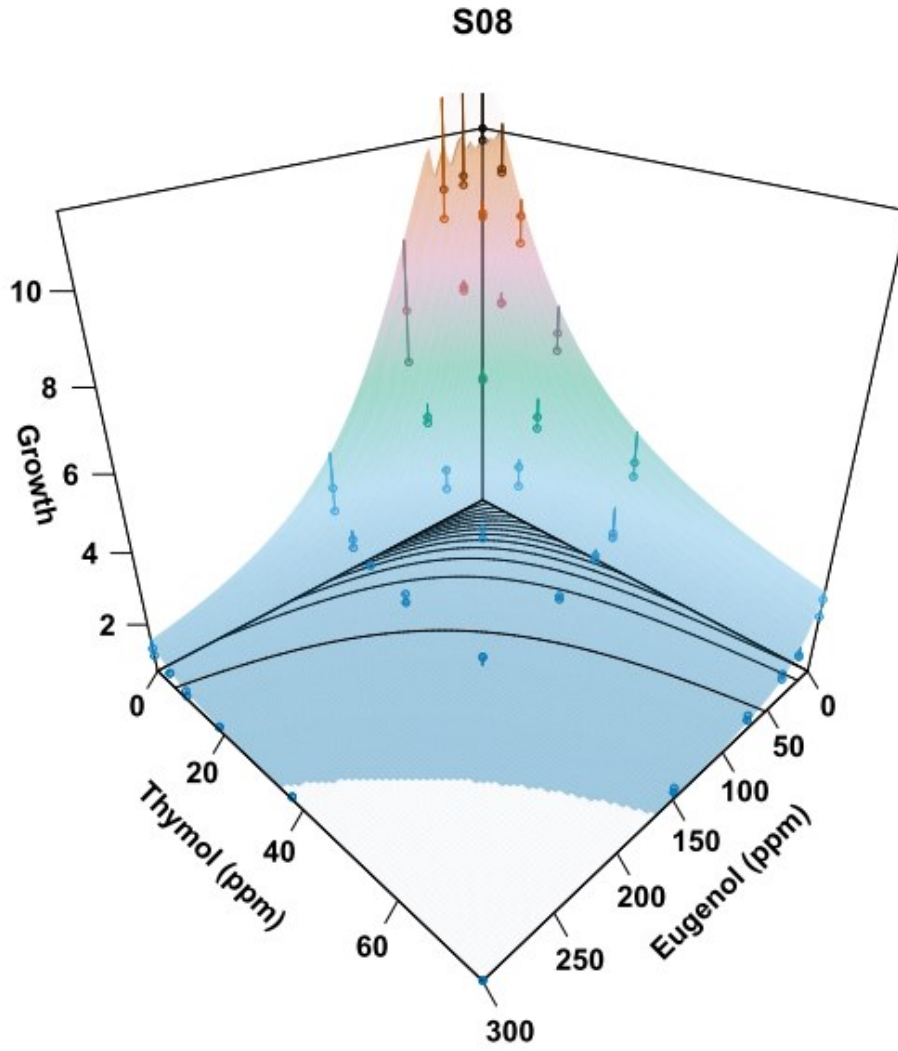

60

61

62
